# Supplementary material for: Whole CMV Proteome Pattern Recognition Analysis after HSCT Identifies Unique Epitope Targets Associated with the CMV Status
Source: PLOS journal article supplement (doi:10.1371/journal.pone.0089648), 2014-04-16
Supplement: S5 (10.1371/journal.pone.0089648.s005) [file journal.pone.0089648.s005]

## Supplementary Tables S1

Table S1 - Patient characteristics

| Serological group | Pat         | Age at HSCT | SCT-type | Cond. | TBI 0=no<br>1=yes | HSC source | Primary diagnosis | CMV-infection<br>0=no; 1=yes | CMV-disease | Anti-CMV treatment |
|-------------------|-------------|-------------|----------|-------|-------------------|------------|-------------------|------------------------------|-------------|--------------------|
| D-R-              | A           | 17.1        | MUD      | conv  | 0                 | PB         | CML chronic phase | 0                            | 0           | -                  |
| D-R-              | B           | 35.7        | MUD      | conv  | 0                 | BM         | CML               | 0                            | 0           | -                  |
| D-R-              | C           | 7.5         | SIB      | red   | 0                 | BM         | Fanconi's anemia  | 0                            | 0           | -                  |
| D-R-              | D           | 53.1        | SIB      | conv  | 0                 | PB         | AML               | 0                            | 0           | -                  |
| D-R-              | E (removed) | 14.9        | SIB      | conv  | 1                 | BM         | ALL CR3           | 1                            | 0           | -                  |
| D-R+              | F           | 52.8        | MUD      | red   | 0                 | PB         | Polycythemia Vera | 1 (low VL)                   | 0           | -                  |
| D-R+              | G           | 14.8        | SIB      | conv  | 1                 | BM         | ALL CR2           | 1                            | 0           | GCV                |
| D-R+              | H           | 11.6        | MUD      | conv  | 0                 | BM         | AML CR            | 0                            | 0           | -                  |
| D-R+              | I           | 53.8        | SIB      | red   | 0                 | PB         | CML               | 1                            | 0           | GCV                |
| D-R+              | J           | 45.4        | MUD      | conv  | 0                 | PB         | AML CR1           | 1                            | 0           | GCV/ Foscarnet     |
| D+R-              | K (removed) | 0.8         | misMUD   | conv  | 0                 | CB         | AML M5B CR        | 0                            | 0           | -                  |
| D+R-              | L           | 6.5         | SIB      | red   | 0                 | BM         | Fanconi's anemia  | 1 (low VL)                   | 0           | -                  |
| D+R-              | M           | 0.5         | MUD      | conv  | 0                 | PB         | FHL               | 0                            | 0           | -                  |
| D+R-              | N           | 65.8        | SIB      | red   | 0                 | PB         | Colorectal cancer | 0                            | 0           | -                  |
| D+R-              | O           | 1.3         | FAM      | conv  | 0                 | BM         | Thalassemia major | 0                            | 0           | -                  |
| D+R+              | P           | 41.7        | SIB      | red   | 0                 | PB         | AML               | 0                            | 0           | -                  |

|      |           |      |     |      |   |    |                  |   |   |     |
|------|-----------|------|-----|------|---|----|------------------|---|---|-----|
| D+R+ | Q         | 3.6  | SIB | conv | 1 | BM | T cell ALL       | 1 | 0 | GCV |
| D+R+ | R         | 44.4 | MUD | conv | 0 | PB | AML CR2          | 1 | 0 | GCV |
| D+R+ | S         | 3.5  | MUD | conv | 0 | BM | AML CR2          | 0 | 0 | -   |
| D+R+ | T         | 40.9 | MUD | conv | 0 | PB | AML CR           | 1 | 0 | GCV |
| R+D- | ICS pat 1 | 58.2 | SIB | conv | 1 | PB | NHL              | 1 | 0 | -   |
| R+D+ | ICS pat 2 | 36.0 | MUD | conv | 1 | BM | Hodgkin lymphoma | 1 | 0 | GCV |
| R+D+ | ICS pat 3 | 38.6 | MUD | conv | 0 | BM | AML CR1          | 1 | 0 | GCV |
| R+D+ | ICS pat 4 | 53.8 | MUD | red  | 0 | PB | AML CR1          | 1 | 0 | GCV |
| R+D+ | ICS pat 5 | 56.6 | MUD | conv | 0 | PB | AML CR1          | 1 | 0 | GCV |
| R+D+ | ICS pat 6 | 63.3 | MUD | red  | 0 | PB | AML CR1          | 0 | 0 | -   |
| R+D+ | ICS pat 7 | 37.5 | MUD | red  | 0 | PB | AML CR1          | 0 | 0 | -   |

Pat, patient; HSCT, hematopoietic stem cell transplantation; SCT-typ, stem cell transplantation type; Cond., conditioning; TBI, total body irradiation; HSC source, hematopoietic stem cell source; CMV, *Cytomegalovirus*; D+, CMV seropositive donor; R-, CMV seronegative recipient; MUD, matching unrelated donor; SIB, sibling donor; misMUD, mis-matching MUD (<sup>1</sup>Pat K HLA-B allele mismatch but was HLA-DR allele identical); FAM, family donor; conv, conventional; red, reduced; PB, peripheral blood; BM, bone marrow; CB, cord blood; CML, chronic myeloid leukemia; AML, acute myeloid leukemia; ALL, acute lymphoblastic leukemia; CR, clinical regression; FHL, familial hemophagocytic lymphohistiocytosis; VL, viral load; GCV, ganciclovir. The material from patients 'ICS1-7' was used to analyze both CMV epitope recognition patterns as well as intracellular cytokine staining in response to the corresponding peptide pools.
